# Supplementary material
Source: Royal Society of Chemistry journal article supplement (doi:10.1039/d6cp01027j)
Supplement: d6cp01027j1.pdf [file d6cp01027j1.pdf]

## Supplementary Information

### Digital Discovery of Large-Scale Optoelectronic Materials via MPNICE Machine-Learning Force Fields

Hadi Abroshan,\* H. Shaun Kwak, David J. Giesen, John L. Weber, and Mathew D.  
Halls

Materials Science, Schrödinger, Inc., 1540 Broadway, 24<sup>th</sup> Floor, New York, NY 10036

\* **Correspondence:** Hadi Abroshan, [hadi.abroshan@schrodinger.com](mailto:hadi.abroshan@schrodinger.com)

**In the supplementary materials, we present:**

- (1) Figure S1.** Chemical structure of 100 molecular systems relevant to organic optoelectronics to compare geometry optimization using the MLFF and DFT.
- (2) Table S1.** Benchmarking results (RMSDs and cpu time) for the 100-molecule validation set.

|                                                                                     |                                                                                     |                                                                                      |                                                                                       |
|-------------------------------------------------------------------------------------|-------------------------------------------------------------------------------------|--------------------------------------------------------------------------------------|---------------------------------------------------------------------------------------|
| 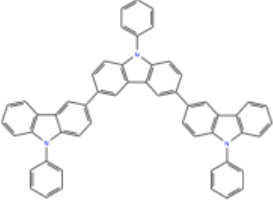   |    |    |    |
| title Tris-PCz                                                                      | title tCP                                                                           | title TAZ                                                                            | title PPT                                                                             |
|    |    |    |    |
| title PPO27                                                                         | title Phen-TRZ                                                                      | title Pentacene                                                                      | title p-bPPhenB                                                                       |
|   |   |   |   |
| title oCBP                                                                          | title DPVBi                                                                         | title DPPvA                                                                          | title DMQA                                                                            |
|  |  |  |  |
| title DCz-BTP                                                                       | title B4PvPPm                                                                       | title B4PvmPm                                                                        | title DOBNA-OAr                                                                       |
|  |  |  |  |
| title DiKTa                                                                         | title DBF-TRZ                                                                       | title DABNA-1                                                                        | title BCzPh                                                                           |

|                                                                                     |                                                                                     |                                                                                      |                                                                                       |
|-------------------------------------------------------------------------------------|-------------------------------------------------------------------------------------|--------------------------------------------------------------------------------------|---------------------------------------------------------------------------------------|
| 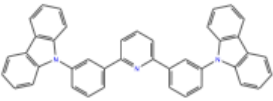   |    |    |    |
| title 26DCzPPv                                                                      | title 3TPYMB                                                                        | title 3DPA2FBN                                                                       | title 2PTZBN                                                                          |
|    |    |    |    |
| title 3DPA-DiKTa                                                                    | title 3TPA-DiKTa                                                                    | title DMAC-BP                                                                        | title DTAF                                                                            |
|   |   |   |   |
| title 2CzPN                                                                         | title 3N-T2T                                                                        | title 3P-T2T                                                                         | title 2-TNATA                                                                         |
|  |  |  |  |
| title 3DPvMpdTC                                                                     | title 4CzBN                                                                         | title 4CzDPO                                                                         | title 4CzIPN                                                                          |
|  |  |  |  |
| title 4CzPN                                                                         | title ACRSA                                                                         | title ADN                                                                            | title B3PvPB                                                                          |

|                                                                                     |                                                                                     |                                                                                      |                                                                                       |
|-------------------------------------------------------------------------------------|-------------------------------------------------------------------------------------|--------------------------------------------------------------------------------------|---------------------------------------------------------------------------------------|
| 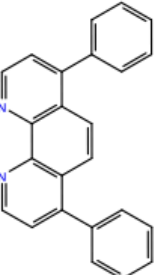   |    |    |    |
| title BPhen                                                                         | title BTB                                                                           | title CBP                                                                            | title BCP                                                                             |
|    |    |    |    |
| title Cz2BP                                                                         | title DACT-II                                                                       | title DBP                                                                            | title DCJTb                                                                           |
|   |   |   |   |
| title DMACDPS                                                                       | title DMTDac                                                                        | title DPEPO                                                                          | title F4TCNQ                                                                          |
|  |  |  |  |
| title HATCN                                                                         | title MADN                                                                          | title MPAC-Dip-BS                                                                    | title NPB                                                                             |
|  |  |  |  |
| title OXD-7                                                                         | title OBA-BrO                                                                       | title 4CzPN-tBu                                                                      | title PAB                                                                             |

|                                                                                     |                                                                                     |                                                                                      |                                                                                       |
|-------------------------------------------------------------------------------------|-------------------------------------------------------------------------------------|--------------------------------------------------------------------------------------|---------------------------------------------------------------------------------------|
| 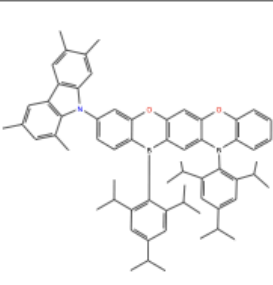   |    |    |    |
| title MCz-BOBO                                                                      | title MPAc-BS                                                                       | title PX-SF-B                                                                        | title PXZ-TRZ                                                                         |
|    |    |    |    |
| title PX-TRZ-B                                                                      | title PYD-2Cz                                                                       | title PXZoB                                                                          | title PrFTP                                                                           |
|   |   |   |   |
| title Rubrene                                                                       | title Spiro NPB                                                                     | title Spiro TPD                                                                      | title T2T                                                                             |
|  |  |  |  |
| title TBPe                                                                          | title TCNQ                                                                          | title TCTA                                                                           | title TAPC                                                                            |
|  |  |  |  |
| title TBRb                                                                          | title Spiro-OMeTAD                                                                  | title TDBA-AC                                                                        | title TMCz-BO                                                                         |

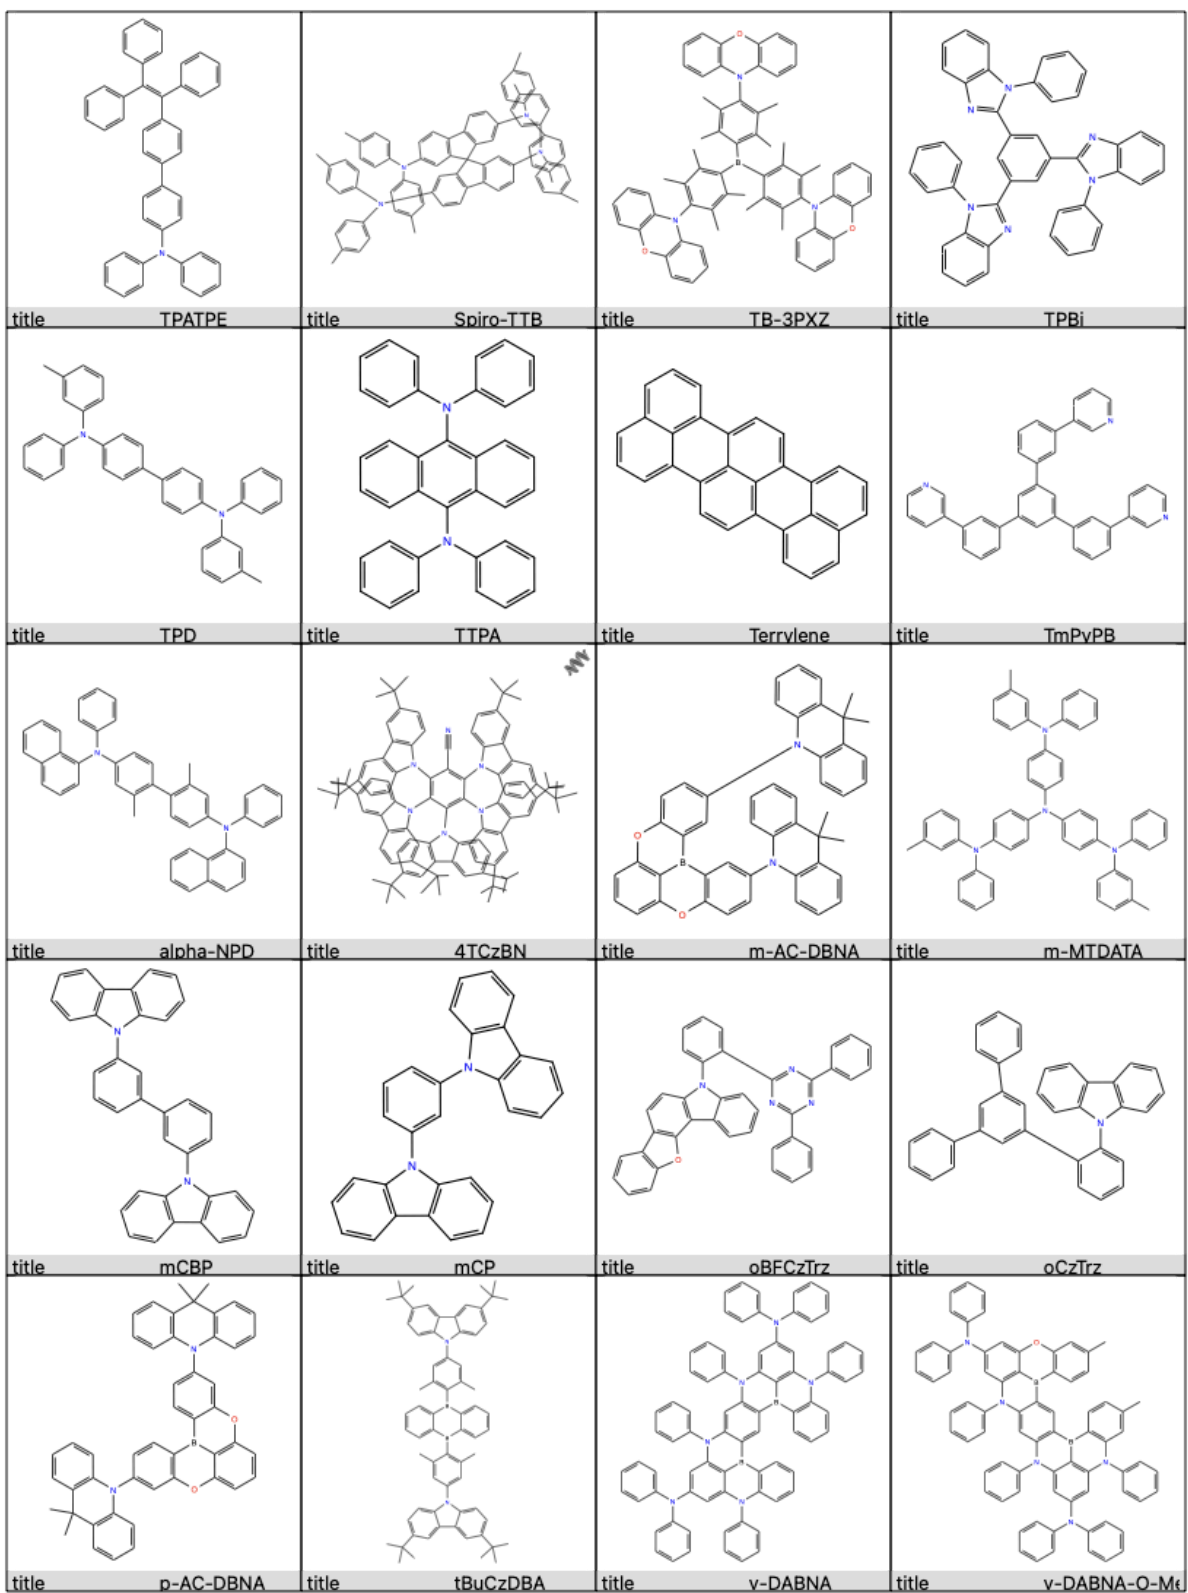

**Figure S1.** Chemical structure of 100 molecular systems relevant to organic optoelectronics to compare geometry optimization using the MLFF and DFT.

**Table S1.** Benchmarking results for the 100-molecule validation set. For each molecule (structures provided in Figure S1), the RMSD of atomic positions (including hydrogen atoms) is reported, comparing the final geometry optimized via the MPNICE framework against the DFT reference (B3LYP/6-31G(d,p)). Performance is quantified by the total CPU time (in seconds) required for convergence under identical starting configurations and optimization criteria.

| Title      | RMSD / Å | MLFF cpu time | DFT cpu time | RMSD per atom / Å |
|------------|----------|---------------|--------------|-------------------|
| Tris-PCz   | 0.260    | 4.725         | 3711.367     | 0.003             |
| tCP        | 0.052    | 3.758         | 2254.077     | 0.001             |
| TAZ        | 0.209    | 3.323         | 3150.639     | 0.003             |
| PPT        | 0.419    | 17.908        | 31052.131    | 0.006             |
| PPO27      | 0.684    | 4.688         | 10721.150    | 0.009             |
| Phen-TRZ   | 0.064    | 2.811         | 6824.624     | 0.001             |
| Pentacene  | 0.021    | 2.362         | 572.994      | 0.001             |
| p-bPPhenB  | 0.598    | 6.312         | 16888.264    | 0.008             |
| oCBP       | 0.066    | 7.595         | 4087.735     | 0.001             |
| DPVBi      | 0.234    | 4.116         | 6380.640     | 0.003             |
| DPPyA      | 0.336    | 4.415         | 5530.547     | 0.005             |
| DMQA       | 0.020    | 2.684         | 452.233      | 0.000             |
| DCz-BTP    | 0.100    | 4.578         | 5447.432     | 0.002             |
| B4PyPPm    | 0.133    | 4.100         | 7676.802     | 0.002             |
| B4PymPm    | 0.130    | 3.243         | 3393.457     | 0.002             |
| DOBNA-OAr  | 0.355    | 9.875         | 13317.249    | 0.004             |
| DiKTa      | 0.054    | 2.552         | 1089.796     | 0.002             |
| DBF-TRZ    | 0.101    | 5.068         | 5650.607     | 0.001             |
| DABNA-1    | 0.061    | 4.373         | 2165.779     | 0.001             |
| BCzPh      | 0.118    | 3.164         | 1625.628     | 0.002             |
| 26DCzPPy   | 0.368    | 7.534         | 19009.146    | 0.005             |
| 3TPYMB     | 0.278    | 19.664        | 25056.876    | 0.003             |
| 3DPA2FBN   | 0.282    | 11.557        | 30488.598    | 0.004             |
| 2PTZBN     | 0.084    | 4.537         | 3244.328     | 0.002             |
| 3DPA-DiKTa | 0.217    | 19.979        | 27339.464    | 0.002             |
| 3TPA-DiKTa | 0.718    | 31.378        | 80253.361    | 0.006             |
| DMAC-BP    | 0.941    | 5.676         | 23122.386    | 0.011             |
| DTAF       | 0.346    | 11.098        | 12443.715    | 0.003             |
| 2CzPN      | 0.108    | 5.995         | 5142.372     | 0.002             |
| 3N-T2T     | 0.319    | 3.720         | 5946.405     | 0.005             |
| 3P-T2T     | 0.291    | 3.312         | 6519.173     | 0.005             |
| 2-TNATA    | 0.855    | 23.165        | 100036.965   | 0.007             |

|             |       |        |            |       |
|-------------|-------|--------|------------|-------|
| 3DPyMpDTC   | 0.588 | 9.963  | 22933.186  | 0.005 |
| 4CzBN       | 0.290 | 9.718  | 26830.289  | 0.003 |
| 4CzDPO      | 0.265 | 26.218 | 86508.804  | 0.002 |
| 4CzIPN      | 0.082 | 11.355 | 8462.507   | 0.001 |
| 4CzPN       | 0.185 | 12.858 | 31381.957  | 0.002 |
| ACRSA       | 0.029 | 3.033  | 3796.765   | 0.001 |
| ADN         | 0.207 | 3.969  | 3840.093   | 0.004 |
| B3PyPB      | 0.235 | 3.101  | 5288.718   | 0.003 |
| BPhen       | 0.091 | 5.053  | 2845.250   | 0.002 |
| BTB         | 0.044 | 3.760  | 3411.917   | 0.001 |
| CBP         | 0.047 | 3.247  | 991.231    | 0.001 |
| BCP         | 0.393 | 5.438  | 1495.694   | 0.008 |
| Cz2BP       | 0.159 | 3.648  | 5424.415   | 0.002 |
| DACT-II     | 0.565 | 10.779 | 50272.718  | 0.005 |
| DBP         | 0.053 | 7.237  | 12708.602  | 0.001 |
| DCJTB       | 0.248 | 6.757  | 27996.042  | 0.004 |
| DMACDPS     | 0.362 | 15.108 | 51812.562  | 0.004 |
| DMTDAc      | 0.183 | 5.205  | 48508.789  | 0.002 |
| DPEPO       | 0.217 | 5.982  | 10918.494  | 0.003 |
| F4TCNQ      | 0.020 | 2.739  | 145.599    | 0.001 |
| HATCN       | 0.021 | 2.865  | 467.897    | 0.001 |
| MADN        | 0.243 | 4.689  | 11171.103  | 0.004 |
| MPAc-Dip-BS | 0.245 | 57.727 | 96955.623  | 0.002 |
| NPB         | 0.602 | 6.939  | 18634.899  | 0.008 |
| OXD-7       | 0.796 | 3.005  | 1001.899   | 0.012 |
| OBA-BrO     | 0.281 | 11.424 | 28854.298  | 0.004 |
| 4CzPN-tBu   | 1.327 | 88.263 | 307644.715 | 0.007 |
| PAB         | 0.262 | 15.316 | 14439.709  | 0.003 |
| MCz-BOBO    | 0.877 | 35.297 | 156827.716 | 0.006 |
| MPAc-BS     | 1.660 | 63.897 | 97311.691  | 0.015 |
| PX-SF-B     | 1.289 | 8.172  | 30414.912  | 0.015 |
| PXZ-TRZ     | 0.054 | 3.105  | 2145.790   | 0.001 |
| PX-TRZ-B    | 1.043 | 11.839 | 69217.321  | 0.010 |
| PYD-2Cz     | 0.047 | 3.600  | 2845.653   | 0.001 |
| PXZoB       | 0.334 | 22.514 | 25023.215  | 0.005 |
| PrFTPA      | 0.376 | 27.128 | 75664.844  | 0.004 |
| Rubrene     | 0.440 | 6.040  | 3875.563   | 0.006 |
| Spiro_NPB   | 0.633 | 5.585  | 55687.524  | 0.007 |
| Spiro_TPD   | 0.701 | 5.511  | 56863.252  | 0.008 |

|                        |       |         |            |       |
|------------------------|-------|---------|------------|-------|
| <b>T2T</b>             | 0.105 | 3.483   | 3249.301   | 0.002 |
| <b>TBP<sub>e</sub></b> | 0.027 | 3.840   | 1199.627   | 0.000 |
| <b>TCNQ</b>            | 0.022 | 2.828   | 113.561    | 0.001 |
| <b>TCTA</b>            | 0.171 | 6.645   | 37559.444  | 0.002 |
| <b>TAPC</b>            | 0.215 | 12.257  | 9045.456   | 0.002 |
| <b>TBR<sub>b</sub></b> | 0.413 | 14.845  | 30808.046  | 0.004 |
| <b>Spiro-OMeTAD</b>    | 0.587 | 125.526 | 214406.662 | 0.004 |
| <b>TDBA-AC</b>         | 0.194 | 7.594   | 17192.408  | 0.002 |
| <b>TMCz-BO</b>         | 0.388 | 7.281   | 20795.147  | 0.006 |
| <b>TPATPE</b>          | 0.116 | 3.460   | 19529.953  | 0.001 |
| <b>Spiro-TTB</b>       | 0.796 | 113.566 | 124045.153 | 0.005 |
| <b>TB-3PXZ</b>         | 0.362 | 50.380  | 116796.555 | 0.003 |
| <b>TPBi</b>            | 0.451 | 5.893   | 10017.567  | 0.006 |
| <b>TPD</b>             | 0.295 | 9.924   | 8547.015   | 0.004 |
| <b>TTPA</b>            | 0.094 | 4.224   | 6612.787   | 0.001 |
| <b>Terrylene</b>       | 0.016 | 2.418   | 1355.186   | 0.000 |
| <b>TmPyPB</b>          | 0.145 | 3.331   | 2613.603   | 0.002 |
| <b>alpha-NPD</b>       | 0.311 | 7.325   | 35446.901  | 0.004 |
| <b>4TCzBN</b>          | 1.403 | 184.185 | 485412.687 | 0.006 |
| <b>m-AC-DBNA</b>       | 0.761 | 8.465   | 68960.941  | 0.008 |
| <b>m-MTDATA</b>        | 0.488 | 23.621  | 79081.435  | 0.004 |
| <b>mCBP</b>            | 0.634 | 6.845   | 10228.058  | 0.010 |
| <b>mCP</b>             | 0.060 | 2.875   | 1149.533   | 0.001 |
| <b>oBFCzTrz</b>        | 0.705 | 5.435   | 18198.009  | 0.010 |
| <b>oCzTrz</b>          | 0.394 | 3.757   | 5025.261   | 0.006 |
| <b>p-AC-DBNA</b>       | 0.421 | 8.389   | 32519.298  | 0.005 |
| <b>tBuCzDBA</b>        | 1.644 | 13.474  | 116779.175 | 0.011 |
| <b>v-DABNA</b>         | 0.871 | 36.461  | 122760.083 | 0.006 |
| <b>v-DABNA-O-Me</b>    | 0.663 | 27.045  | 68222.685  | 0.005 |
